# Supplementary material
Source: PubMed Central journal article supplement (PMC4425227)
Supplement: Supp_Figure1.pdf [file Supp_Figure1.pdf]

Human and Murine intron 5 s-SHIP promoter regions  
(EMBOSS needle program)

```
Hu   1  -----AAAT--TTGCATTGTAAACACCTGTGTGTGTG   30
          |||| |||  |||.|.|.
Mo   1  ATATTTAGCTCTCCAGACCAAATCTTG---GTGAAACCC-----   36

Hu  31  TGTGTGTGTGTGTGTGTGTGTGTGTGTGTGTGTGTGTGTGTATATAAACACAGAAGGTTGG   80
          .|.|.|.|.|.|.|.|.|.|.|.|.|.|.|.|.|.|.|.|.|.|.|.|.|.|.|.|.
Mo  37  -----ATGCATTTGCATTTGTGTGTGTCTACAAACACTGAAGGTTAA   79

Hu  81  GAACCATGGATAACTAAGTGAAGTCATTTTGT--CACT-----CAG   119
          |||.|.|.|.|.|.|.|.|.|.|.|.|.|.|.|.|.|.|.|.|.|.
Mo  80  GAAGCATG-----CTCCTT--AGTAATTTTATAGCAGTTTGCCTTCCAG   122

Hu 120  ATTTGA---ATTTTCTACAGGCTATAGAGTGCAGTTTGGCTAAAGCAA   165
          |.|.|.|.|.|.|.|.|.|.|.|.|.|.|.|.|.|.|.|.|.|.|.|.|.|.
Mo 123  A-TTGAAAACAGATTCTATAGGCTACACAGTGTCTAAATGGATTATG----   167

Hu 166  ACCT-AGGTACAG-----TCAGGACTACACAATTCCAGTTCGCTGTGGGT   209
          |||.|.|.|.|.|.|.|.|.|.|.|.|.|.|.|.|.|.|.|.|.|.|.
Mo 168  --CTCAGATACAGATTGAAAAGGA-TACA-----GAT   196

Hu 210  TGGGAAGGGATGGG---TGGGCCAG--TGCTGG--CAAGCCTTGATCTTT   252
          |||.|.|.|.|.|.|.|.|.|.|.|.|.|.|.|.|.|.|.|.|.|.|.|.|.
Mo 197  TGAAAAGGGTCGGGGTCTGGGCCAGGATGACGGGCCAA--CT--ATCTTT   242

          p53 motif +/-
Hu 253  GCCCGGGCTTGTCTTC TCGGGGAGAATTACCTGCTTCTGCTGGACTGAGG   302
          |||.|.|.|.|.|.|.|.|.|.|.|.|.|.|.|.|.|.|.|.|.|.|.|.|.
Mo 243  GCCCGGGCTTGTCTTC CAGGGAAGGGTTACAGGATTCACC---ACTGGGG   289

Hu 303  -GTGCCCTCATCT-CTGGCTAGAGCCCGTGCTGCCATGGAAGACTCTTTC   350
          |||.|.|.|.|.|.|.|.|.|.|.|.|.|.|.|.|.|.|.|.|.|.|.|.
Mo 290  TGTGGCCT-ATCTGCT-GTTAGGACCTGAATTGCC-TG---GAGTGTTTC   333

Hu 351  CGGTGCCCACTAATCCTTGATGTTACCTTG-TCCCCTGCCCCCAG   395
          .|.|.|.|.|.|.|.|.|.|.|.|.|.|.|.|.|.|.|.|.|.|.|.|.
Mo 334  TAGTTC CCACTAGTTGTGAACTTTACCTTGAACCTCTGCTCCCAG   379
          |
          Inr
```

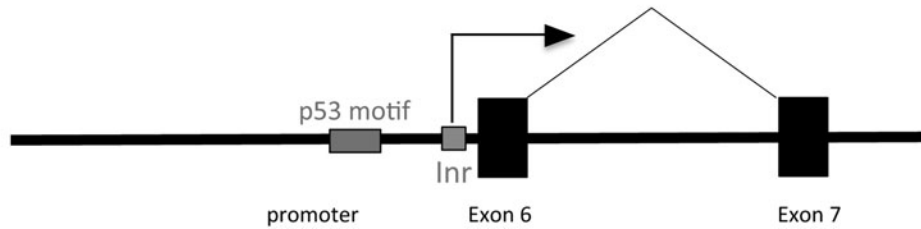

**SUPPLEMENTARY FIG. S1.** Human and murine intron 5 s-SHIP promoter regions. EMBOSS needle alignment of the human and murine intron 5 of *Ship1* gene; p53 motif is shown; Inr: initiator element.
