# Supplementary material
Source: PubMed Central journal article supplement (PMC4425227)
Supplement: Supp_Figure2.pdf [file Supp_Figure2.pdf]

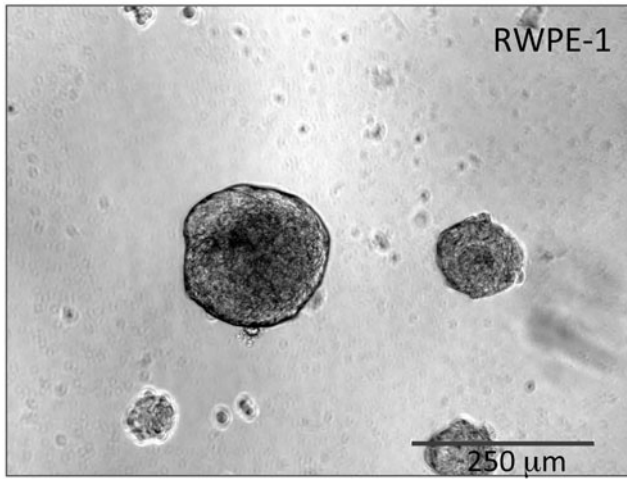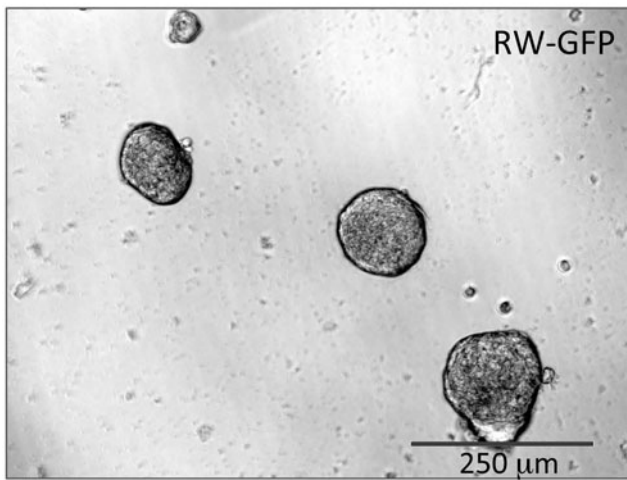

**SUPPLEMENTARY FIG. S2.** Spheres derived from RWPE-1 and RW-GFP cells. Typical floating spheres formed were photographed (bright field images) after 2 weeks in culture.
