# Supplementary material
Source: PubMed Central journal article supplement (PMC4425227)
Supplement: Supp_Figure3.pdf [file Supp_Figure3.pdf]

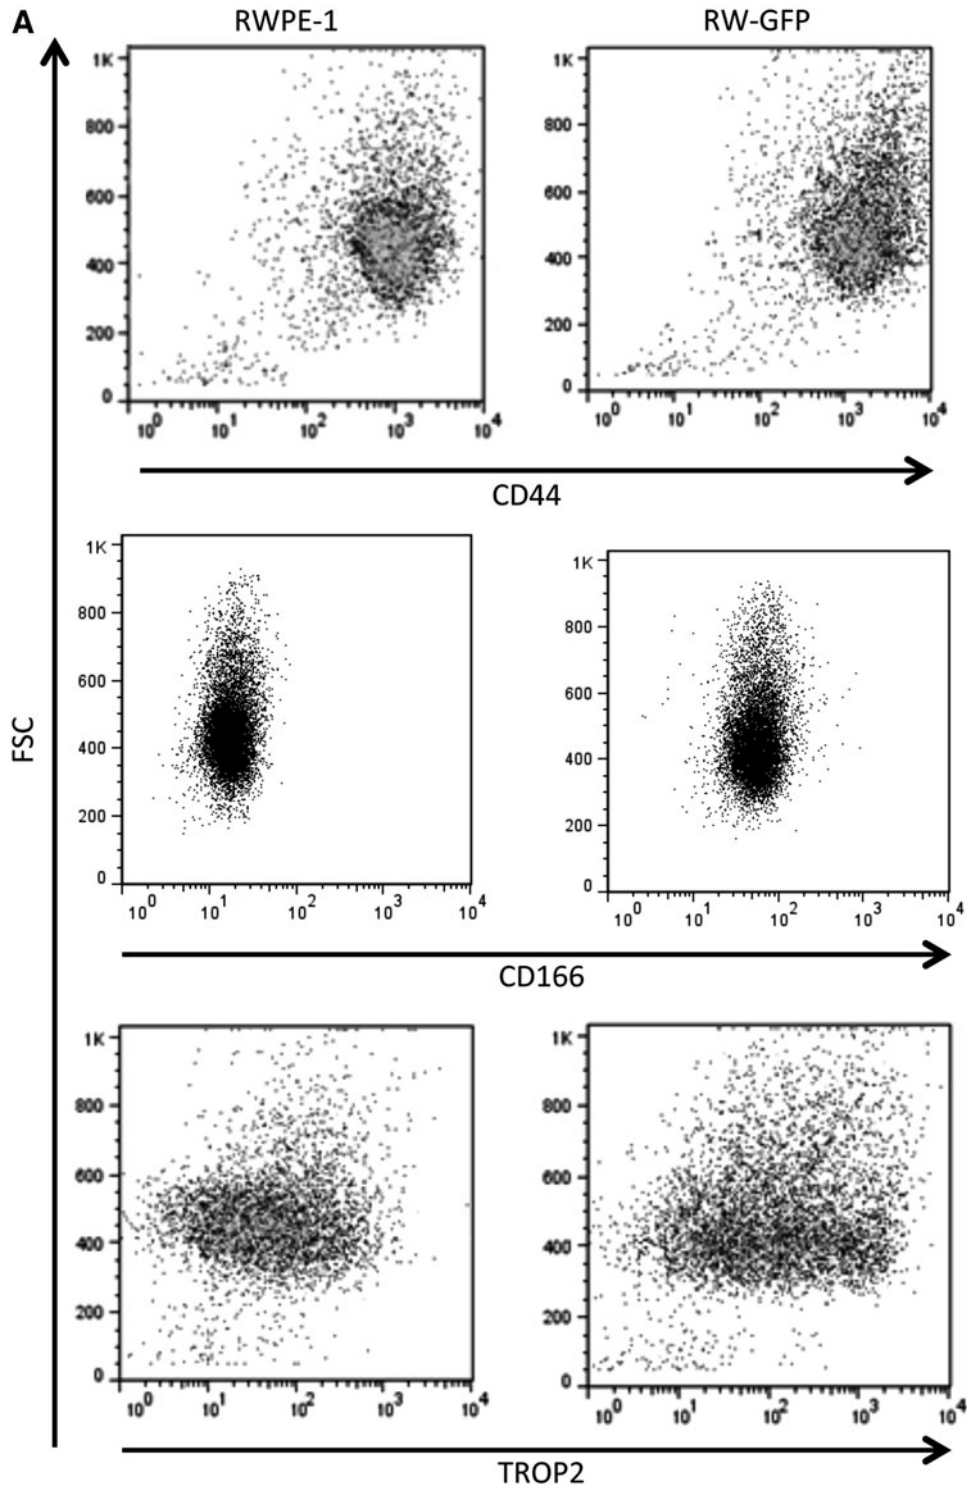

**SUPPLEMENTARY FIG. S3.** Flow cytometry analysis of stem cell marker expression. Representative dot plots of parental RWPE-1 and RW-GFP cells labeled with each antibody. (A) CD44, CD166, TROP2, and (B) integrin  $\alpha 6$  (CD49f) and integrin  $\beta 1$  (CD29); setting was done using unstained or isotype-labeled cells, which gave similar results. FSC, forward side scatter.

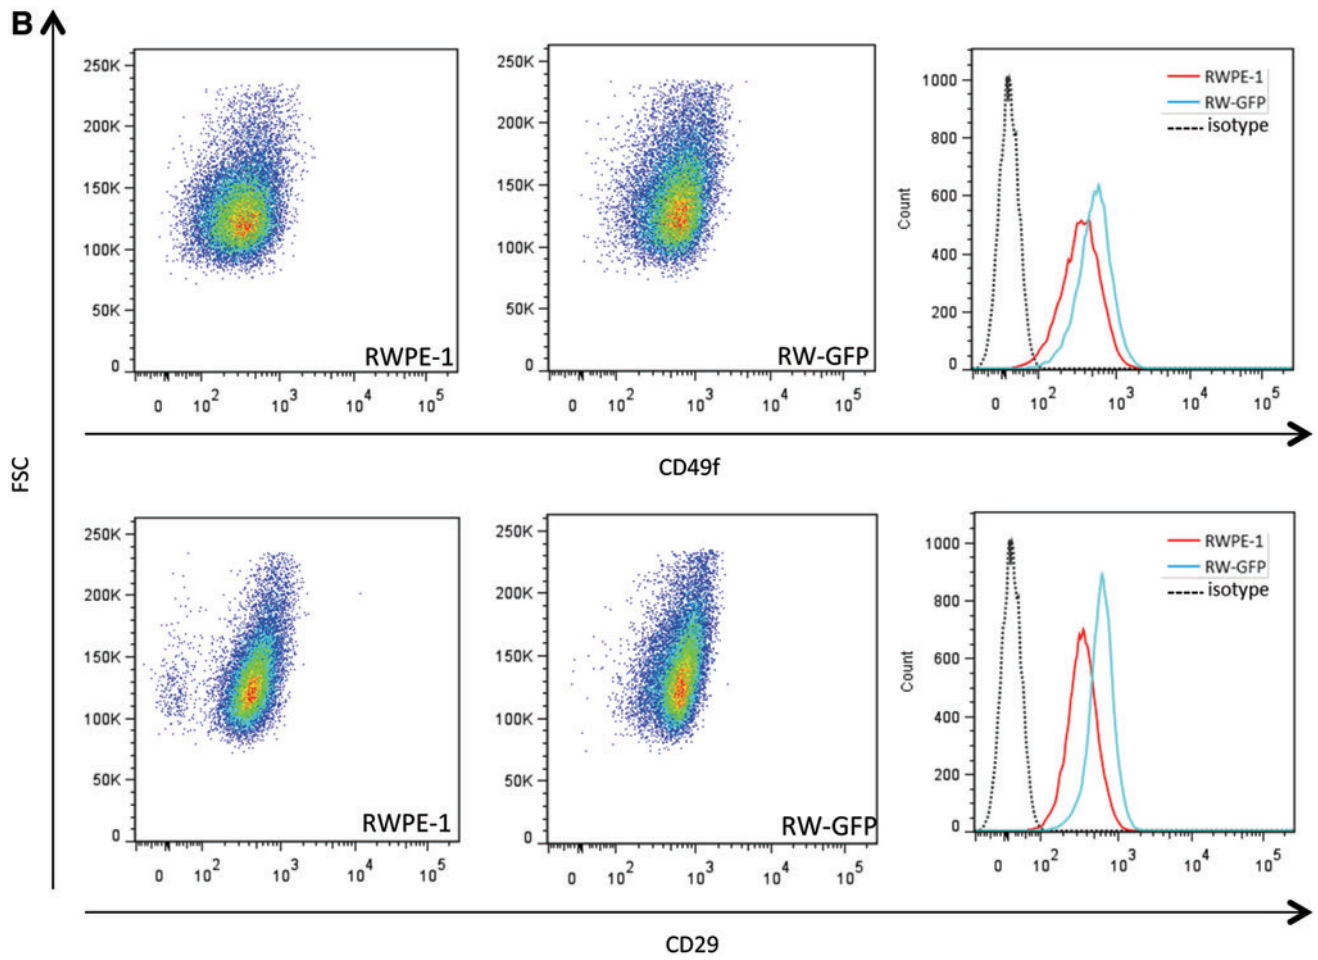

SUPPLEMENTARY FIG. S3. (Continued).
