# Supplementary material
Source: PubMed Central journal article supplement (PMC4425227)
Supplement: Supp_Table1.pdf [file Supp_Table1.pdf]

## Supplementary Data

SUPPLEMENTARY TABLE S1. PRIMERS AND siRNA  
USED IN THIS STUDY

| name           | 5' to 3'                  |
|----------------|---------------------------|
|                | <b>RT-qPCR</b>            |
| abcg2 as       | GCTGCAAAGCCGTAATCCATATC   |
| abcg2 s        | ACAACCATGTCATCTTGCTGTC    |
| c-myc as       | TCTTCTGTTCCTCCTCAGAGTCG   |
| c-myc s        | TTCTCTCCGTCCTCGGATTCTCTG  |
| H19 as         | TGGCCATGAAGATGGAGTCG      |
| H19 s          | TACAACCACTGCACTACCTG      |
| klf4 as        | GGTGTGCCTTGAGATGGGAA      |
| klf4 s         | TACCAAGAGCTCATGCCACC      |
| nanog as       | CAGGTCTTACCTGTTTGTAGCTGAG |
| nanog s        | CCTCCTCCATGGATCTGCTTATTCA |
| notch as       | GTA CTGACCTGTCCACTCT      |
| notch s        | CTGTGAGGAAAATATCGAC       |
| oct3/4 as      | GTGAAGTGAGGGCTCCATA       |
| oct3/4 s       | GAAGGATGTGGTCCGAGTGT      |
| P63 as         | AACATATAGGCTGTTCCAGA      |
| P63 s          | GAAAGTTATTACCGATCCAC      |
| RLP10 as       | GATGACCAGCCCAAAGGAGA      |
| RPLP0 s        | GTGATGTGCAGCTGATCAAGACT   |
| shh as         | TCAACTTGTCCTTACACCTCTGA   |
| shh s          | AAGGAACTCACCCCAATTACAA    |
| sox2 as        | CGGGGCCGGTATTTATAATC      |
| sox2 s         | AACCCCAAGATGCACA ACTC     |
| S-ship as      | TCAACGTCGACTTTGAGCTGC     |
| S-ship s       | CTTGATGTTACCTTGTCCTGTC    |
|                | <b>siRNA</b>              |
| siRNA H19 1 as | GGCCUUCUGAACACCUUA        |
| siRNA H19 1 s  | UAAGGUGUUCAGGAAGGCC       |
| siRNA H19 2 as | GGCUCUGGAAGGUGAAGCU       |
| siRNA H19 2 s  | AGCUUACCUUCCAGAGCC        |
| siRNA GFP as   | AAGAUGAACUUCAGGGUCAGC     |
| siRNA GFP s    | GCUGACCCUGAAGUUAUUCTT     |
